# Supplementary material for: Rice Pan-genome Array (RPGA): an efficient genotyping solution for pan-genome-based accelerated crop improvement in rice
Source: bioRxiv or medRxiv preprint supplement (doi:10.1101/2022.01.19.476884), 2022-01-21
Supplement: Supplementary file [file media-1.pdf]

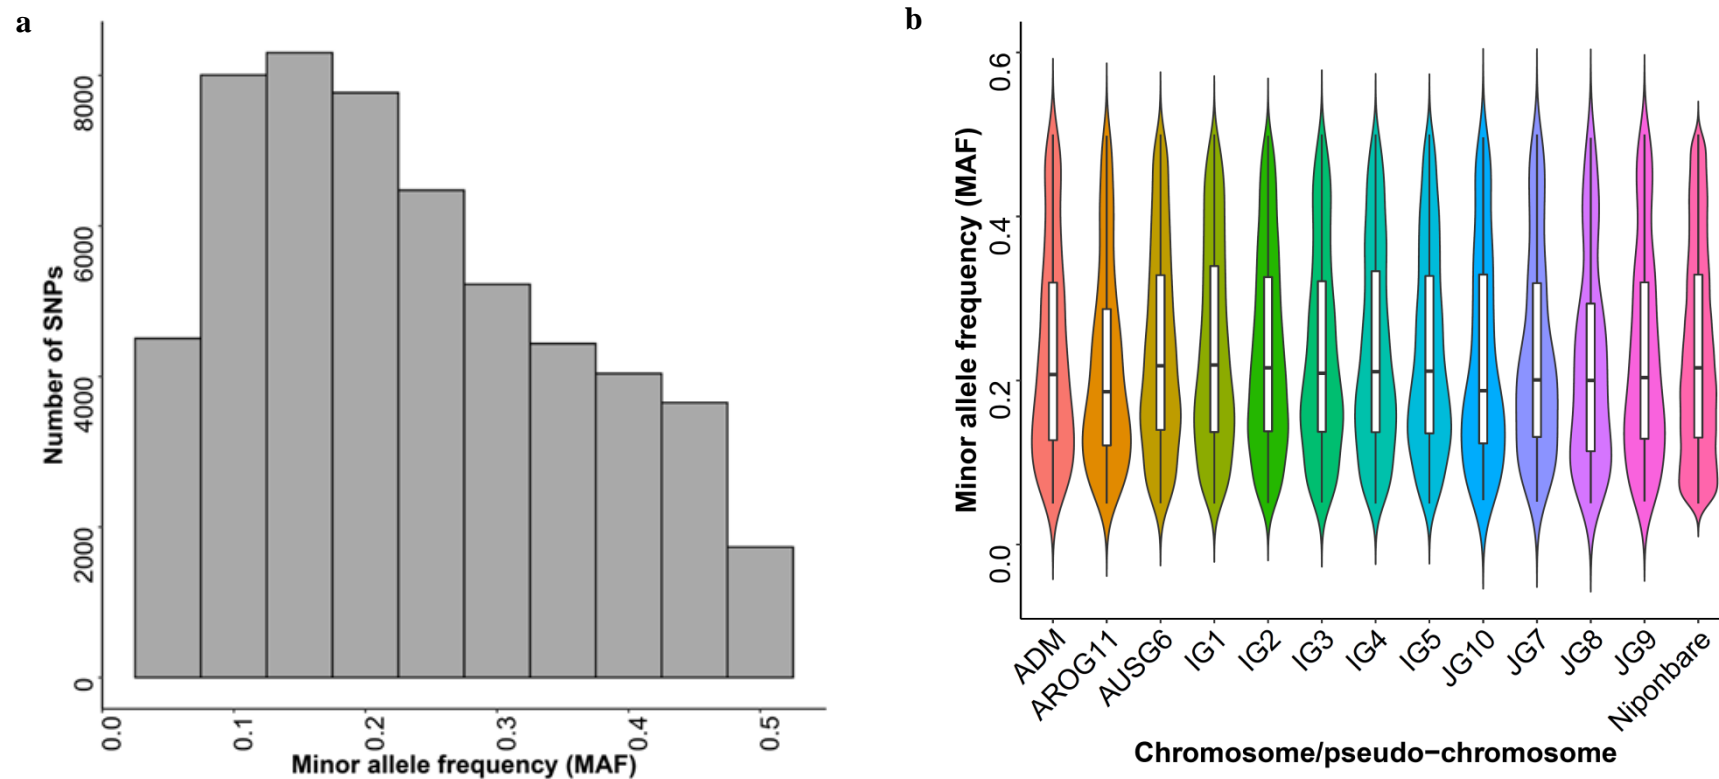

**Supplementary Figure 1. Informativeness of SNPs genotyped in a diversity panel with rice pan-genome genotyping array (RPGA).** **a)** Minor allele frequencies (MAFs) of Poly High-Resolution SNPs recorded in a diversity panel of 271 Indian rice accessions. **b)** Minor allele frequencies (MAFs) of SNPs from Nipponbare reference genome as well as from twelve pseudo-chromosomes from 3K rice pan-genome representing population-specific/unbalanced SNPs. (Adm: Admixed Group; AROG: Aromatic Group; AUSG: *Aus* group; IG: *Indica* Group; JG: *Japonica* Group).
