# Supplementary material for: Rice Pan-genome Array (RPGA): an efficient genotyping solution for pan-genome-based accelerated crop improvement in rice
Source: bioRxiv or medRxiv preprint supplement (doi:10.1101/2022.01.19.476884), 2022-01-21
Supplement: Supplementary file [file media-2.pdf]

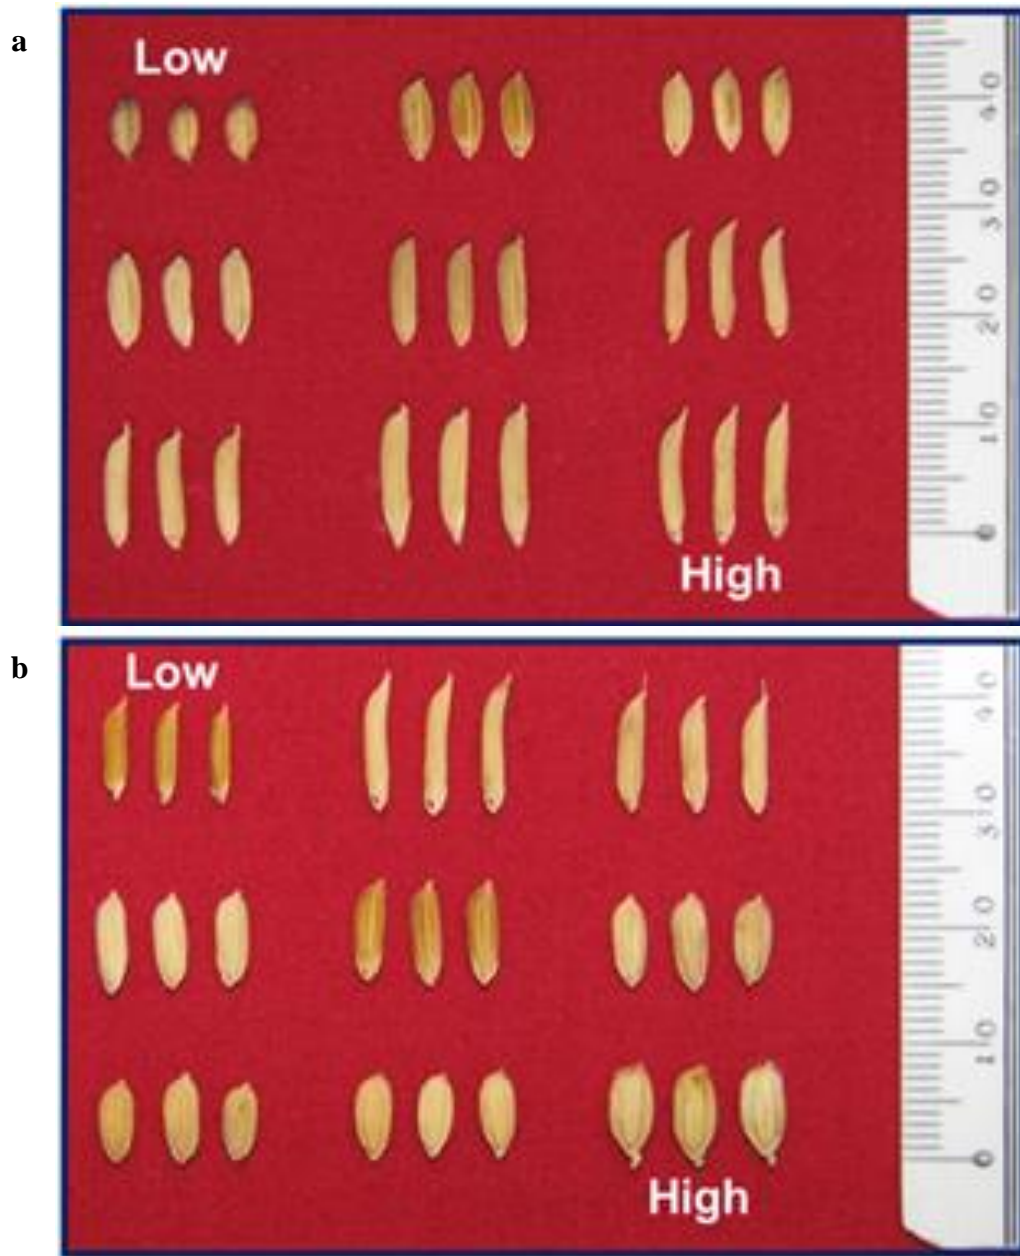

**Supplementary Figure 2. Grains of representative set of rice accessions selected from a diversity panel of 271 Indian rice accessions displaying wide variability for a) grain length and b) grain width traits.**
