# Supplementary material for: Rice Pan-genome Array (RPGA): an efficient genotyping solution for pan-genome-based accelerated crop improvement in rice
Source: bioRxiv or medRxiv preprint supplement (doi:10.1101/2022.01.19.476884), 2022-01-21
Supplement: Supplementary file [file media-6.pdf]

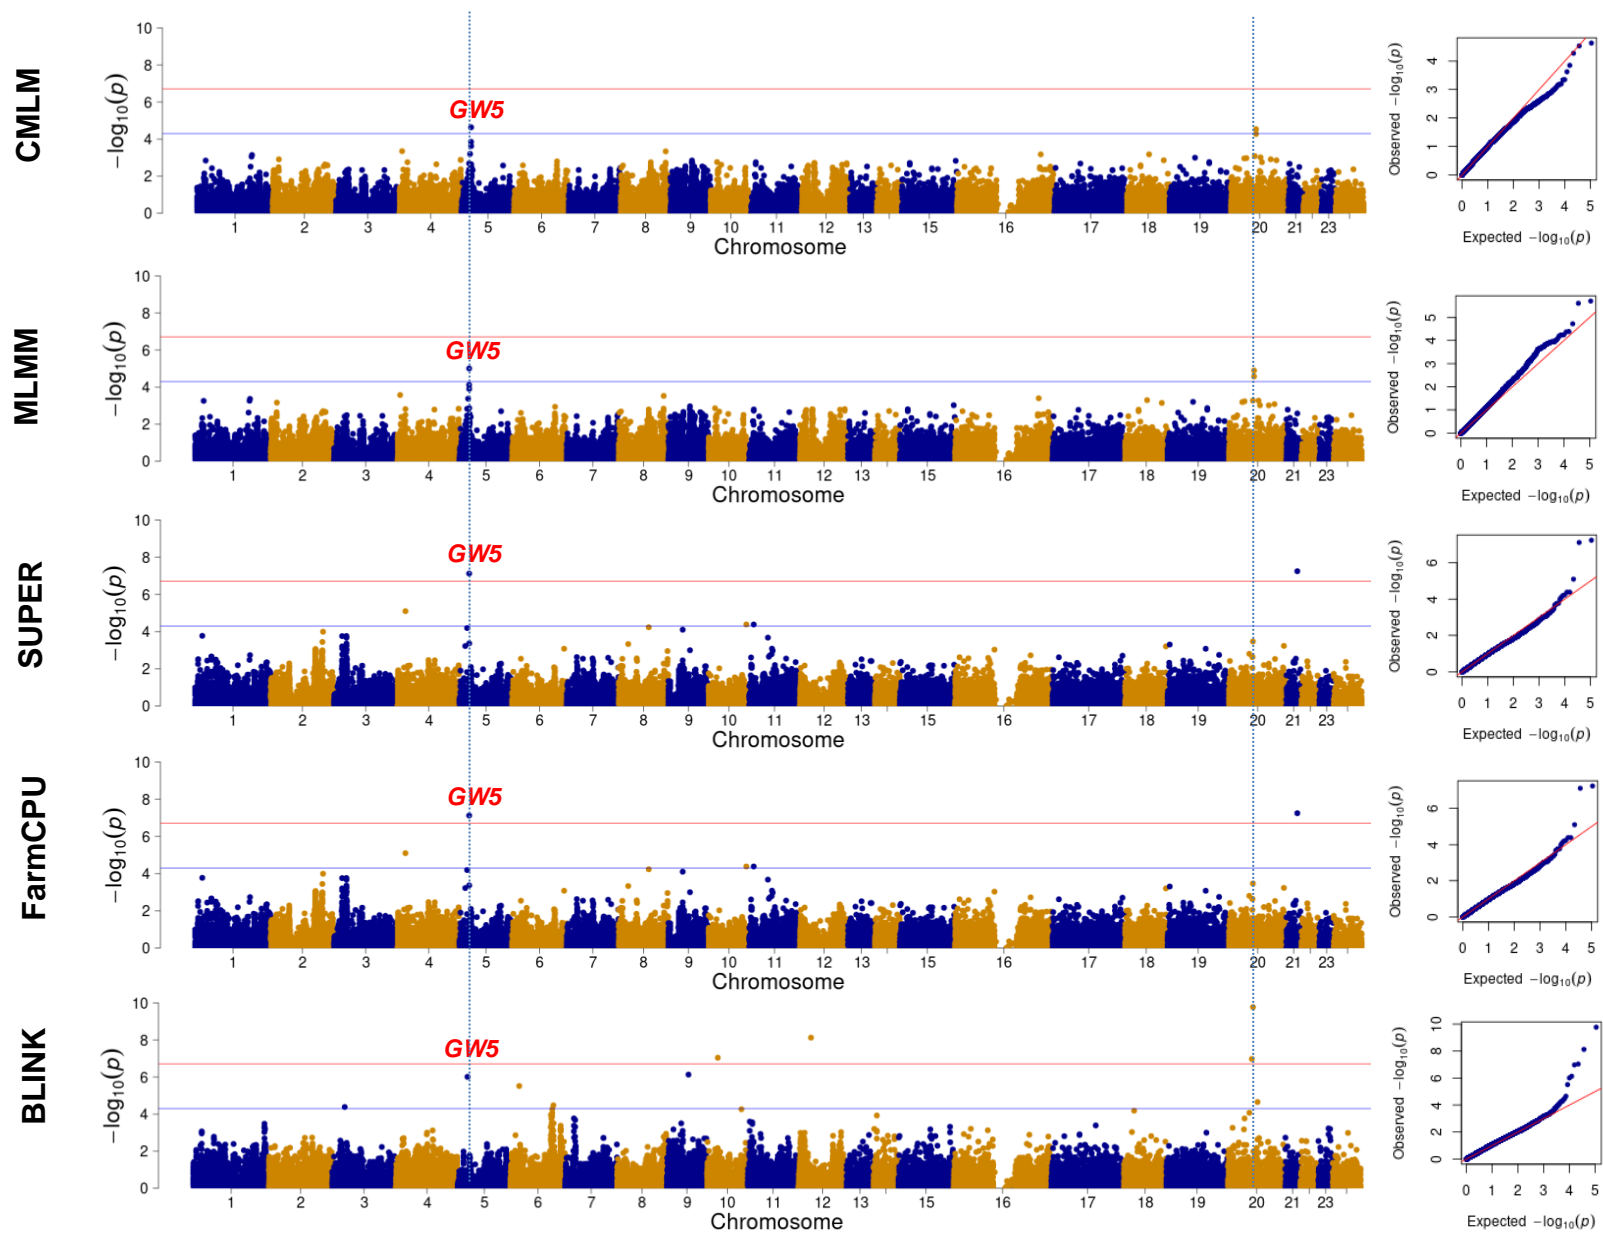

**Supplementary Figure 6. Manhattan plots and QQ plots depicting results of genome-wide association study (GWAS) for thousand-grain weight trait using five different association models.** Chromosomes 1 to 12 represent twelve Nipponbare chromosomes, whereas, chromosomes 13 to 24 represent twelve sub-population group specific pseudo-chromosomes associated loci which harbor previously known grain weight genes are marked on the top. The blue horizontal line represents a stringent Benjamini-Hochberg threshold whereas the red horizontal line represents a less stringent suggestive threshold.
