# Supplementary material for: Rice Pan-genome Array (RPGA): an efficient genotyping solution for pan-genome-based accelerated crop improvement in rice
Source: bioRxiv or medRxiv preprint supplement (doi:10.1101/2022.01.19.476884), 2022-01-21
Supplement: Supplementary file [file media-9.pdf]

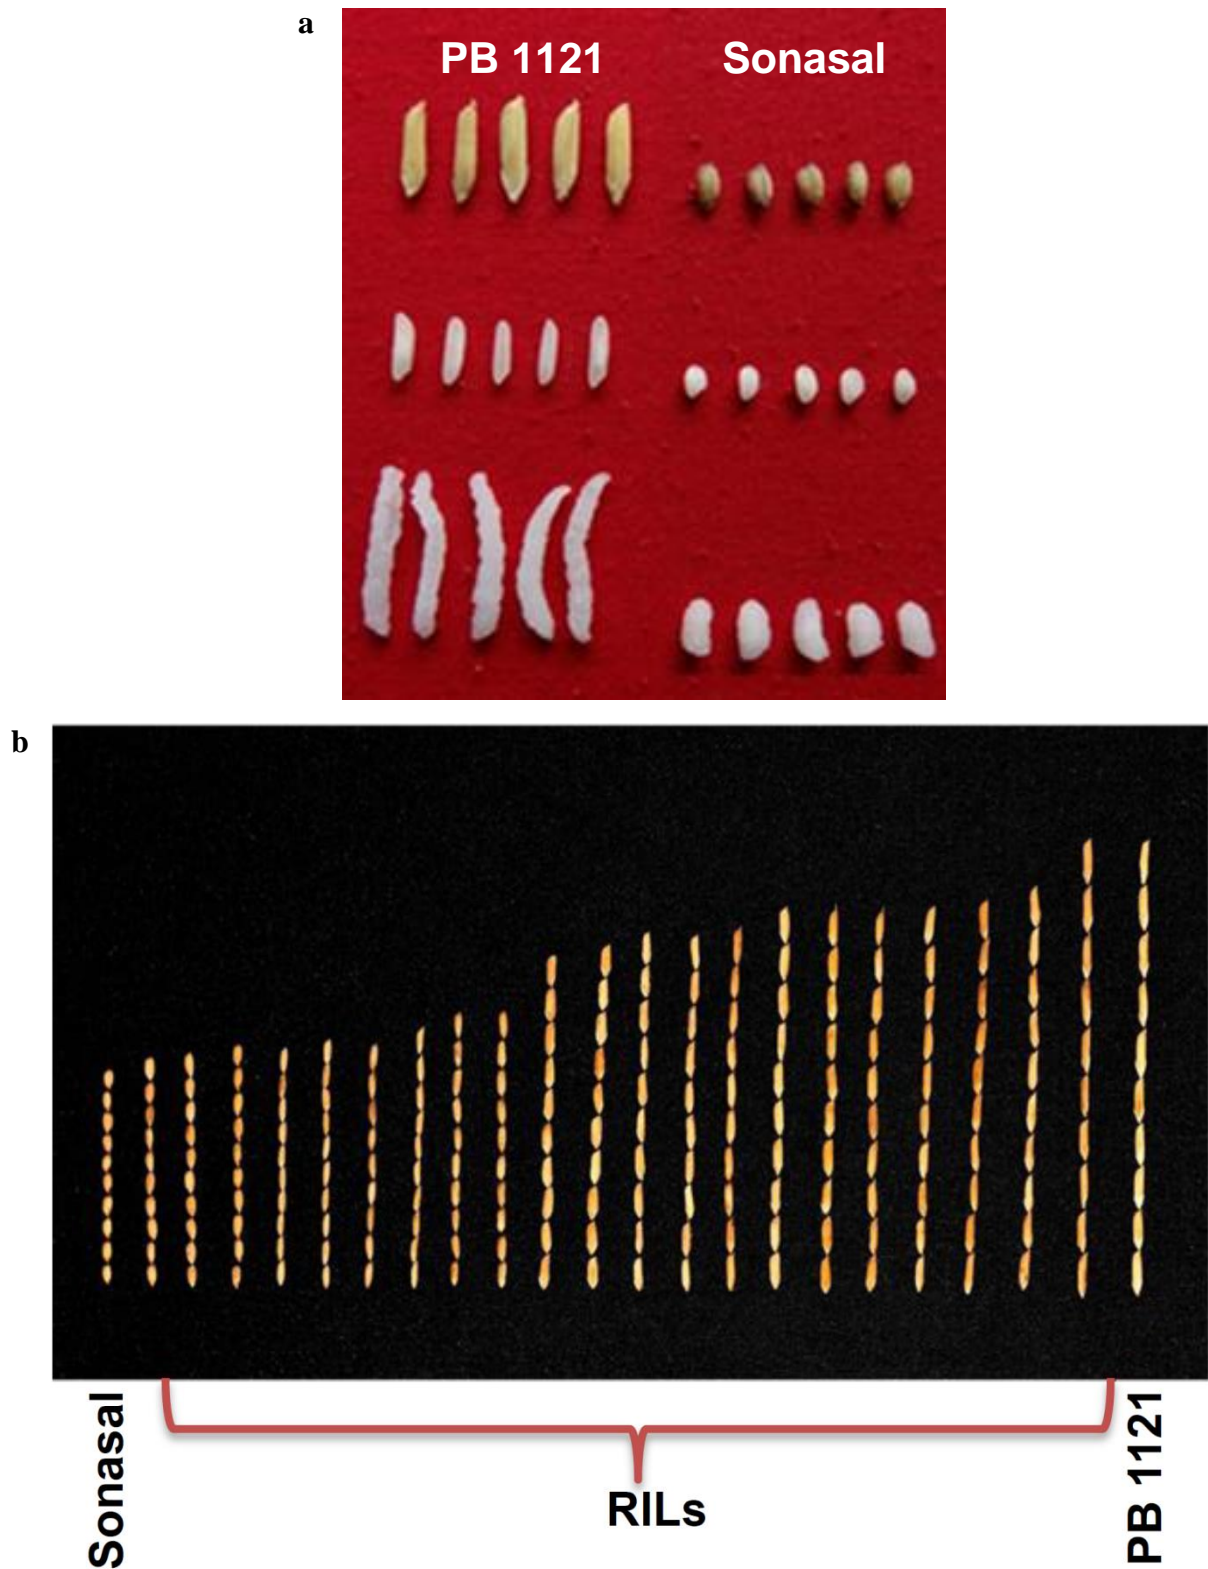

**Supplementary Figure 9. Images depicting grain size variation in a developed mapping population (Sonasal × Pusa Basmati 1121). a) Rough and milled grains (before and after cooking) of two parental accessions, Sonasal and Pusa Basmati 1121 (PB 1121). b) Rough grain variation in a representative set of mapping individuals of a RIL population along with parental accessions, Sonasal and PB 1121.**
