# Supplementary material for: Rice Pan-genome Array (RPGA): an efficient genotyping solution for pan-genome-based accelerated crop improvement in rice
Source: bioRxiv or medRxiv preprint supplement (doi:10.1101/2022.01.19.476884), 2022-01-21
Supplement: Supplementary file [file media-10.pdf]

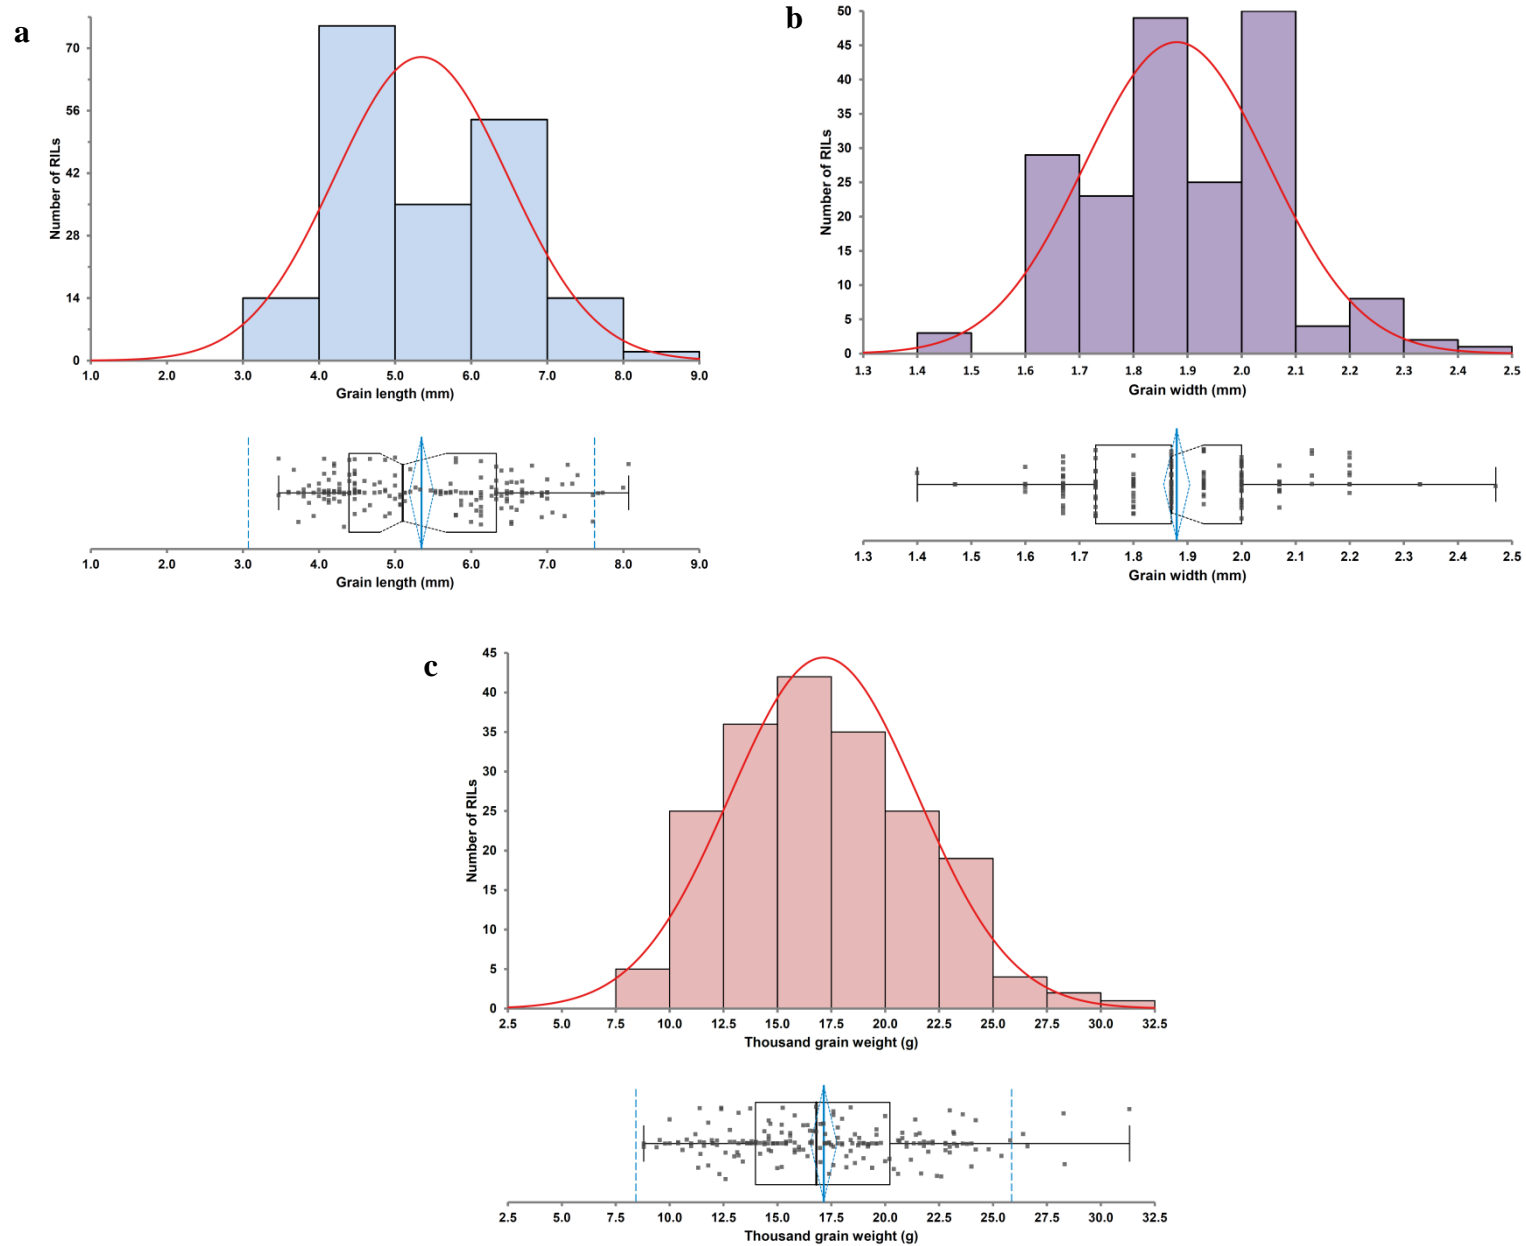

**Supplementary Figure 10. Quantitative genetic inheritance pattern of grain size/weight traits measured in a RIL (Sonsal × Pusa Basmati 1121) mapping population.** Histograms and boxplots depicting distribution of a) grain length, b) grain width, and c) thousand-grain weight in 188 RILs.
