# Supplementary material for: Rice Pan-genome Array (RPGA): an efficient genotyping solution for pan-genome-based accelerated crop improvement in rice
Source: bioRxiv or medRxiv preprint supplement (doi:10.1101/2022.01.19.476884), 2022-01-21
Supplement: Supplementary file [file media-11.pdf]

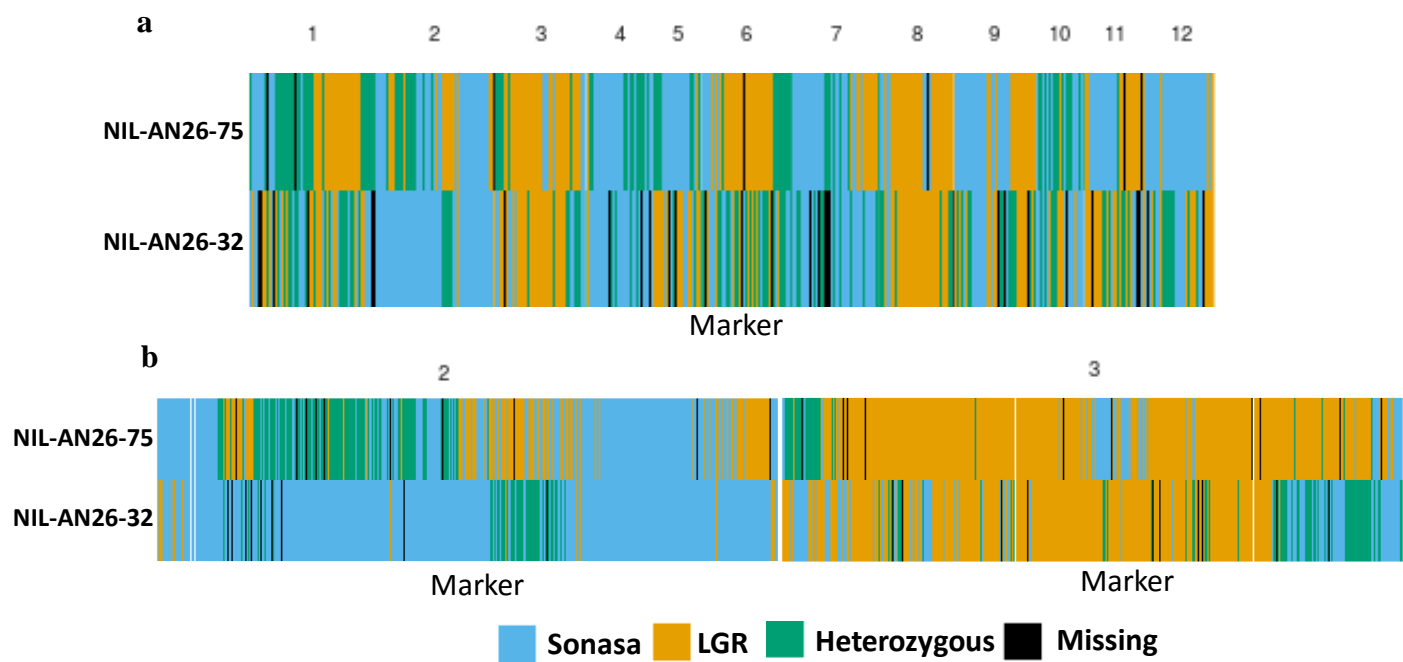

**Supplementary Figure 11. Background analysis of two Sonasal  $\times$  LGR BC<sub>4</sub>F<sub>1</sub> lines. a)** Graphical of Genotype of all 12 rice chromosome, and **b)** Graphical of Genotype of chromosome 2 and chromosome 3.
