# Supplementary material for: Rice Pan-genome Array (RPGA): an efficient genotyping solution for pan-genome-based accelerated crop improvement in rice
Source: bioRxiv or medRxiv preprint supplement (doi:10.1101/2022.01.19.476884), 2022-01-21
Supplement: Supplementary file [file media-12.pdf]

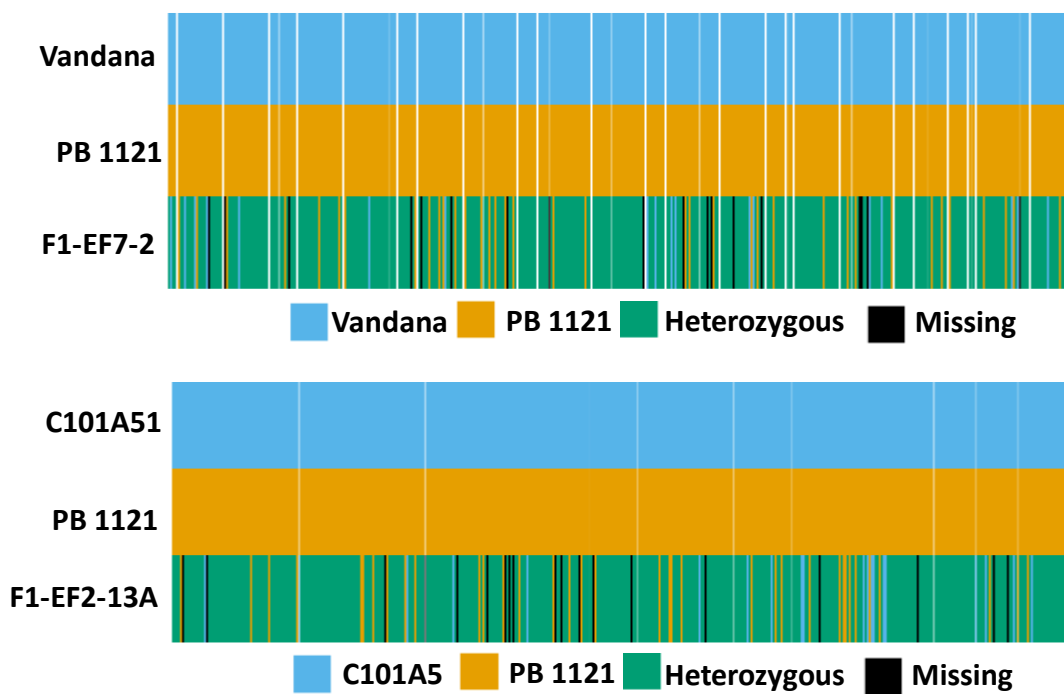

**Supplementary Figure 12. Hybridity test of F<sub>1</sub> hybrids performed using RPGA-based genotyping.**
