# Supplementary material for: Rice Pan-genome Array (RPGA): an efficient genotyping solution for pan-genome-based accelerated crop improvement in rice
Source: bioRxiv or medRxiv preprint supplement (doi:10.1101/2022.01.19.476884), 2022-01-21
Supplement: Supplementary file [file media-13.pdf]

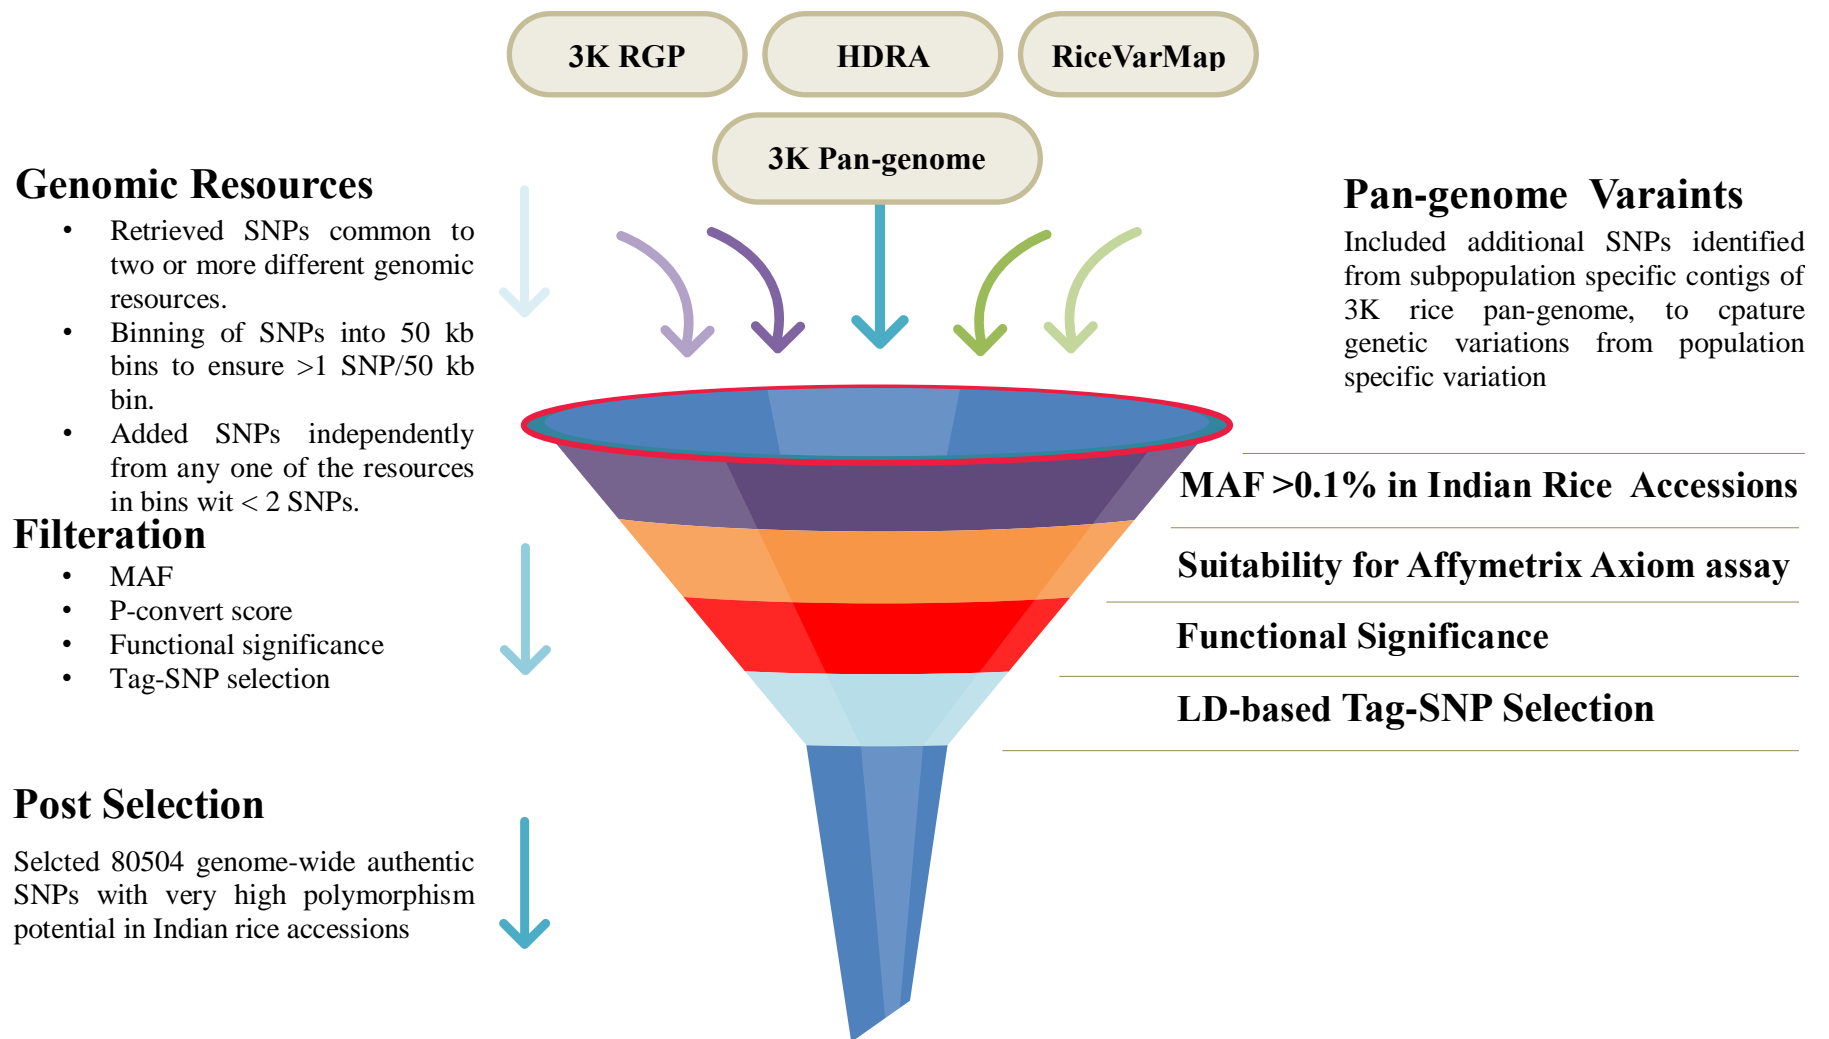

**Supplementary Figure 13. Workflow describing steps involved in designing of Rice Pan-genome Genome Genotyping Array (RPGA).** 3K RGP: 3K Rice Genomes Project, HDRA: High-Density Rice Array, MAF: Minor Allele Frequency
