# Supplementary material for: Rice Pan-genome Array (RPGA): an efficient genotyping solution for pan-genome-based accelerated crop improvement in rice
Source: bioRxiv or medRxiv preprint supplement (doi:10.1101/2022.01.19.476884), 2022-01-21
Supplement: Supplementary file [file media-14.pdf]

**Supplementary Table 1.** Classification of SNPs into six distinct classes produced from RIL genotyping data by Affymetrix Axiom best practice genotyping workflow

| <b>Conversion Type</b>           | <b>Count</b> | <b>Percentage</b> |
|----------------------------------|--------------|-------------------|
| Poly High Resolution (PHR)       | 46523        | 57.78             |
| Other                            | 11468        | 14.25             |
| Mono High Resolution (MHR)       | 9013         | 11.20             |
| No Minor Homozygous (NMH)        | 6841         | 8.50              |
| Off Target Variants (OTV)        | 5746         | 7.14              |
| Call Rate Below Threshold (CRBT) | 913          | 1.13              |
