# Supplementary material for: Rice Pan-genome Array (RPGA): an efficient genotyping solution for pan-genome-based accelerated crop improvement in rice
Source: bioRxiv or medRxiv preprint supplement (doi:10.1101/2022.01.19.476884), 2022-01-21
Supplement: Supplementary file [file media-15.pdf]

**Supplementary Table 2.** Distribution of SNPs in six different classes from genotyping data of a diversity panel

| <b>Conversion Type</b>           | <b>Count</b> | <b>Percentage</b> |
|----------------------------------|--------------|-------------------|
| Poly High Resolution (PHR)       | 48133        | 59.79             |
| Off-target variants (OTV)        | 12618        | 15.67             |
| Other                            | 12160        | 15.11             |
| No Minor Homozygous (NMH)        | 2646         | 3.29              |
| Call Rate Below Threshold (CRBT) | 2645         | 3.29              |
| Mono High Resolution (MHR)       | 2302         | 2.86              |
