# Supplementary material for: Rice Pan-genome Array (RPGA): an efficient genotyping solution for pan-genome-based accelerated crop improvement in rice
Source: bioRxiv or medRxiv preprint supplement (doi:10.1101/2022.01.19.476884), 2022-01-21
Supplement: Supplementary file [file media-16.pdf]

**Supplementary Table 3.** Characteristics of an ultra-density-genetic map developed using SNPs annotated on the Nipponbare genome

| <b>Chromosomes</b> | <b>Number of Markers</b> | <b>Length (cM)</b> | <b>Average Spacing (cM)</b> | <b>Maximum Spacing (cM)</b> |
|--------------------|--------------------------|--------------------|-----------------------------|-----------------------------|
| 1                  | 1596                     | 179.4              | 0.1                         | 8.3                         |
| 2                  | 848                      | 129.5              | 0.2                         | 17.3                        |
| 3                  | 850                      | 148.7              | 0.2                         | 9.1                         |
| 4                  | 723                      | 112.4              | 0.2                         | 7.7                         |
| 5                  | 1073                     | 111.7              | 0.1                         | 12.3                        |
| 6                  | 689                      | 140.7              | 0.2                         | 41.9                        |
| 7                  | 902                      | 82.6               | 0.1                         | 12.1                        |
| 8                  | 946                      | 84.7               | 0.1                         | 10.5                        |
| 9                  | 252                      | 93.8               | 0.4                         | 37.1                        |
| 10                 | 559                      | 93.3               | 0.2                         | 8.2                         |
| 11                 | 678                      | 122.2              | 0.2                         | 42.2                        |
| 12                 | 747                      | 117.5              | 0.2                         | 37.3                        |
| <b>Total</b>       | <b>9863</b>              | <b>1416.4</b>      | <b>0.1</b>                  | <b>42.2</b>                 |
