# Supplementary material for: Rice Pan-genome Array (RPGA): an efficient genotyping solution for pan-genome-based accelerated crop improvement in rice
Source: bioRxiv or medRxiv preprint supplement (doi:10.1101/2022.01.19.476884), 2022-01-21
Supplement: Supplementary file [file media-17.pdf]

**Supplementary Table 4.** Characteristics of an ultra-density-genetic map developed using combining SNPs annotated on the Nipponbare genome as well as 12 population-specific pseudo-chromosomes

| <b>Chromosomes</b> | <b>Number of Markers</b> | <b>Length (cM)</b> | <b>Average Spacing (cM)</b> | <b>Maximum Spacing (cM)</b> |
|--------------------|--------------------------|--------------------|-----------------------------|-----------------------------|
| 1                  | 2035                     | 311.5              | 0.2                         | 13.5                        |
| 2                  | 1146                     | 200.2              | 0.2                         | 17.5                        |
| 3                  | 991                      | 277.8              | 0.3                         | 11.4                        |
| 4                  | 1037                     | 214.6              | 0.2                         | 8.3                         |
| 5                  | 1403                     | 259.4              | 0.2                         | 14.8                        |
| 6                  | 916                      | 159.6              | 0.2                         | 21.3                        |
| 7                  | 1315                     | 145                | 0.1                         | 16.6                        |
| 8                  | 1241                     | 197.3              | 0.2                         | 9.5                         |
| 9                  | 329                      | 109.2              | 0.3                         | 22.2                        |
| 10                 | 1156                     | 153.9              | 0.1                         | 6.8                         |
| 11                 | 980                      | 137.6              | 0.1                         | 7.4                         |
| 12                 | 1244                     | 146.2              | 0.1                         | 12.6                        |
| <b>Total</b>       | <b>13793</b>             | <b>2312.2</b>      | <b>0.2</b>                  | <b>22.2</b>                 |
