# Supplementary material for: Rice Pan-genome Array (RPGA): an efficient genotyping solution for pan-genome-based accelerated crop improvement in rice
Source: bioRxiv or medRxiv preprint supplement (doi:10.1101/2022.01.19.476884), 2022-01-21
Supplement: Supplementary file [file media-18.pdf]

**Supplementary Table 5.** Details of GWAS for grain length, grain width and thousand-grain weight trait performed using CMLM

| SNP-ID       | Chr/Pseudo-<br>chr | Physical<br>position<br>(bp) | Grain length |                             | Grain width |                             | Length-to-width<br>ratio |                             | Thousand-grain<br>weight |                             | Structural<br>annotation* | Candidate genes                                                    |
|--------------|--------------------|------------------------------|--------------|-----------------------------|-------------|-----------------------------|--------------------------|-----------------------------|--------------------------|-----------------------------|---------------------------|--------------------------------------------------------------------|
|              |                    |                              | P-value      | FDR<br>adjusted<br>P-values | P-value     | FDR<br>adjusted<br>P-values | P-value                  | FDR<br>adjusted<br>P-values | P-value                  | FDR<br>adjusted<br>P-values |                           |                                                                    |
| JG10~6950498 | JG10               | 6950498                      | 1.07E-11     | 5.87E-07                    | NA          | NA                          | NA                       | NA                          | NA                       | NA                          | NA                        | <i>WD repeat-containing protein 12 (LOC_Os07g4093)</i>             |
| JG10~4245875 | JG10               | 4245875                      | 3.38E-08     | 0.001                       | NA          | NA                          | NA                       | NA                          | NA                       | NA                          | NA                        | Unknown function (OsR498G0612839600)                               |
| 7~25105073   | Chr7               | 25105073                     | 2.15E-07     | 0.004                       | NA          | NA                          | NA                       | NA                          | NA                       | NA                          | Upstream                  | <i>Leaf and flower related protein (LOC_Os07g41900)</i>            |
| 3~16733441   | Chr3               | 16733441                     | 2.86E-07     | 0.004                       | NA          | NA                          | NA                       | NA                          | NA                       | NA                          | Intergenic                | <i>GS3 (Os03g0407400)#</i>                                         |
| 12~25514661  | Chr12              | 25514661                     | 8.68E-07     | 0.008                       | NA          | NA                          | NA                       | NA                          | NA                       | NA                          | Intergenic                | <i>IQ calmodulin-binding motif family protein (LOC_Os12g41160)</i> |
| 1~34538998   | Chr1               | 34538998                     | 8.74E-07     | 0.008                       | NA          | NA                          | NA                       | NA                          | NA                       | NA                          | Intergenic                | <i>qGRL1.1/OsGAMYB (LOC_Os01g59660)</i>                            |
| 11~6484221   | Chr11              | 6484221                      | 3.51E-06     | 0.027                       | NA          | NA                          | NA                       | NA                          | NA                       | NA                          | Upstream                  | NA                                                                 |
| 10~20357189  | Chr10              | 20357189                     | 8.13E-06     | 0.055                       | NA          | NA                          | NA                       | NA                          | NA                       | NA                          |                           | NA                                                                 |
| JG10~6243872 | JG10               | 6243872                      | 2.46E-05     | 0.149                       | NA          | NA                          | NA                       | NA                          | 5.69E-08                 | 0.0020                      | NA                        | NA                                                                 |
| 11~24534050  | Chr11              | 24534050                     | NA           | NA                          | 2.35E-10    | 1.29E-05                    | NA                       | NA                          | NA                       | NA                          | 3' UTR                    | <i>Receptor-like protein kinase (LOC_Os11g4097)</i>                |
| 5~5371686    | Chr5               | 5371686                      | NA           | NA                          | 3.36E-08    | 0.00078                     | NA                       | NA                          | NA                       | NA                          | Downstream                | <i>GW5 (LOC_Os05g0952)</i>                                         |
| 11~25612932  | Chr11              | 25612932                     | NA           | NA                          | 5.73E-08    | 0.00078                     | NA                       | NA                          | NA                       | NA                          | Intergenic                | NA                                                                 |
| 5~2422324    | Chr5               | 2422324                      | NA           | NA                          | 1.01E-07    | 0.001                       | NA                       | NA                          | NA                       | NA                          | 3' UTR                    | NA                                                                 |
| IG2~18885542 | IG2                | 18885542                     | NA           | NA                          | 1.93E-07    | 0.001                       | NA                       | NA                          | NA                       | NA                          | NA                        | <i>LOC_Os10g31770</i>                                              |
| 11~23154487  | Chr11              | 23154487                     | NA           | NA                          | 4.38E-06    | 0.034                       | NA                       | NA                          | NA                       | NA                          | Synonymous                | NA                                                                 |
| 5~991259     | Chr5               | 991259                       | NA           | NA                          | 5.25E-06    | 0.035                       | NA                       | NA                          | NA                       | NA                          | 5' UTR                    | NA                                                                 |

| SNP-ID       | Chr/Pseudo-chr+ | Physical position (bp) | Grain length |                       | Grain width |                       | Length-to-width ratio |                       | Thousand-grain weight |                       | Structural annotation* | Candidate genes         |
|--------------|-----------------|------------------------|--------------|-----------------------|-------------|-----------------------|-----------------------|-----------------------|-----------------------|-----------------------|------------------------|-------------------------|
|              |                 |                        | P-value      | FDR adjusted P-values | P-value     | FDR adjusted P-values | P-value               | FDR adjusted P-values | P-value               | FDR adjusted P-values |                        |                         |
| 11~25783593  | Chr11           | 25783593               | NA           | NA                    | 8.95E-06    | 0.054                 | NA                    | NA                    | NA                    | NA                    | Intergenic             | NA                      |
| Adm~7425964  | Adm             | 7425964                | NA           | NA                    | 1.44E-05    | 0.078                 | NA                    | NA                    | NA                    | NA                    | NA                     | NA                      |
| 9~5770786    | Chr9            | 5770786                | NA           | NA                    | 2.25E-05    | 0.102                 | NA                    | NA                    | NA                    | NA                    | Intergenic             | NA                      |
| 11~27490883  | Chr11           | 27490883               | NA           | NA                    | 2.65E-05    | 0.111                 | NA                    | NA                    | NA                    | NA                    | Downstream             | NA                      |
| 3~25711563   | Chr3            | 25711563               | NA           | NA                    | 5.30E-05    | 0.207                 | NA                    | NA                    | NA                    | NA                    | Intergenic             | NA                      |
| 5~5390763    | Chr5            | 5390763                | NA           | NA                    | NA          | NA                    | 2.30E-05              | 0.7946                | 7.60E-08              | 0.00207               | Downstream             | GW5<br>(LOC_Os05g09520) |
| 10~21588761  | Chr10           | 21588761               | NA           | NA                    | NA          | NA                    | NA                    | NA                    | 4.14E-05              | 0.454                 | Intergenic             | NA                      |
| 11~2611306   | Chr11           | 2611306                | NA           | NA                    | NA          | NA                    | NA                    | NA                    | 4.15E-05              | 0.454                 | Upstream               | NA                      |
| 8~17187746   | Chr8            | 17187746               | NA           | NA                    | NA          | NA                    | NA                    | NA                    | 5.82E-05              | 0.501                 | Upstream               | NA                      |
| IG5~14354843 | IG5             | 14354843               | 2.90E-05     | NA                    | NA          | NA                    | 2.90E-05              | 0.7946                | NA                    | NA                    | NA                     |                         |
| IG5~14354791 | IG5             | 14354791               | 5.26E-05     | NA                    | NA          | NA                    | 5.26E-05              | 0.9610                | NA                    | NA                    | NA                     |                         |
| 5~4222429    | Chr5            | 4222429                | NA           | NA                    | NA          | NA                    | NA                    | NA                    | 6.42E-05              | 0.501                 | Intergenic             | NA                      |

Chr: Chromosome; Pseudo-chr: Pseudo-chromosome; 5' UTR/3' UTR: five prime untranslated region/ three prime untranslated region defined as per MSU7.0 annotation; Upstream: SNPs located >2 kb upstream from transcription start site of a gene; Downstream: SNPs located >2 kb downstream from transcription stop site of a gene; IG: Indica Group; JG: Japonica Group; Adm: Admixture \*Structural annotation performed using MSU 7.0 ; #Rice Annotation Project locus ID; The loci detected from pseudo-chromosomes are highlighted in red.
