# Supplementary material for: Rice Pan-genome Array (RPGA): an efficient genotyping solution for pan-genome-based accelerated crop improvement in rice
Source: bioRxiv or medRxiv preprint supplement (doi:10.1101/2022.01.19.476884), 2022-01-21
Supplement: Supplementary file [file media-20.pdf]

**Supplementary Table 7.** Details of GWAS for grain length, grain width and thousand-grain weight trait performed using SUPER

| SNP-ID       | Chr/Pseudo-<br>chr+ | Physical<br>position<br>(bp) | Grain length |                             | Grain width |                             | Length-to-width<br>ratio |                                  | Thousand-grain<br>weight |                             | Structural<br>annotation* | Candidate genes                                                    |
|--------------|---------------------|------------------------------|--------------|-----------------------------|-------------|-----------------------------|--------------------------|----------------------------------|--------------------------|-----------------------------|---------------------------|--------------------------------------------------------------------|
|              |                     |                              | P-value      | FDR<br>adjusted<br>P-values | P-value     | FDR<br>adjusted<br>P-values | P-value                  | FDR<br>adjust<br>ed P-<br>values | P-value                  | FDR<br>adjusted<br>P-values |                           |                                                                    |
| JG10~6950498 | JG10                | 6950498                      | 1.07E-11     | 5.87E-07                    | NA          | NA                          | NA                       | NA                               | NA                       | NA                          | NA                        | <i>WD repeat-containing protein 12 (LOC_Os07g40930)</i>            |
| JG10~4245875 | JG10                | 4245875                      | 3.38E-08     | 0.000925                    | NA          | NA                          | NA                       | NA                               | NA                       | NA                          | NA                        | <i>Unknown function (OsR498G0612839600.01)</i>                     |
| 7~25105073   | Chr7                | 2.5E+07                      | 2.15E-07     | 0.003919                    | NA          | NA                          | NA                       | NA                               | NA                       | NA                          | Upstream                  | <i>Leaf and flower related protein (LOC_Os07g41900)</i>            |
| 3~16733441   | Chr3                | 1.7E+07                      | 2.86E-07     | 0.003919                    | NA          | NA                          | NA                       | NA                               | NA                       | NA                          | Intergenic                | <i>GS3 (Os03g0407400)</i>                                          |
| 12~25514661  | Chr12               | 2.6E+07                      | 8.68E-07     | 0.007971                    | NA          | NA                          | NA                       | NA                               | NA                       | NA                          | Intergenic                | <i>IQ calmodulin-binding motif family protein (LOC_Os12g41160)</i> |
| 1~34538998   | Chr1                | 3.5E+07                      | 8.74E-07     | 0.007971                    | NA          | NA                          | NA                       | NA                               | NA                       | NA                          | Intergenic                | <i>qGRL1.1/OsGAMYB (LOC_Os01g59660)</i>                            |
| 11~6484221   | Chr11               | 6484221                      | 3.51E-06     | 0.027446                    | NA          | NA                          | NA                       | NA                               | NA                       | NA                          | Upstream                  | NA                                                                 |
| 10~20357189  | Chr10               | 2E+07                        | 8.13E-06     | 0.055605                    | NA          | NA                          | NA                       | NA                               | NA                       | NA                          | Intergenic                | NA                                                                 |
| JG10~6243872 | JG10                | 6243872                      | 2.46E-05     | 0.149332                    | NA          | NA                          | 5.69E-08                 | 0.0020                           | 5.69E-08                 | 0.0020783                   | NA                        | NA                                                                 |
| 11~24534050  | Chr11               | 2.5E+07                      | NA           | NA                          | 2.35E-10    | 1.29E-05                    | NA                       | NA                               | NA                       | NA                          | 3' UTR                    | <i>Receptor-like protein kinase precursor (LOC_Os11g40970)</i>     |
| 5~5371686    | Chr5                | 5371686                      | NA           | NA                          | 3.36E-08    | 0.0007                      | NA                       | NA                               | NA                       | NA                          | Downstream                | <i>GW5 (LOC_Os05g09520)</i>                                        |
| 5~5390763    | Chr5                | 5390763                      | NA           | NA                          | NA          | NA                          | 0.00000007               | 0.348                            | NA                       | NA                          | Downstream                | <i>GW5 (LOC_Os05g09520)</i>                                        |
| IG2~18885542 | IG2                 | 1.9E+07                      | NA           | NA                          | 1.93E-07    | 0.001756                    | NA                       | NA                               | NA                       | NA                          | NA                        | <i>LOC_Os10g31770</i>                                              |

| SNP-ID             | Chr/Pseudo-<br>chr+ | Physical<br>position<br>(bp) | Grain length |                             | Grain width     |                             | Length-to-width<br>ratio |                             | Thousand-grain<br>weight |                             | Structural<br>annotation* | Candidate genes                                          |
|--------------------|---------------------|------------------------------|--------------|-----------------------------|-----------------|-----------------------------|--------------------------|-----------------------------|--------------------------|-----------------------------|---------------------------|----------------------------------------------------------|
|                    |                     |                              | P-value      | FDR<br>adjusted<br>P-values | P-value         | FDR<br>adjusted<br>P-values | P-value                  | FDR<br>adjusted<br>P-values | P-value                  | FDR<br>adjusted<br>P-values |                           |                                                          |
| 11~23154487        | Chr11               | 2.30E+07                     | NA           | NA                          | 4.38E-06        | 0.0342                      | NA                       | NA                          | NA                       | NA                          | Synonymous                | NA                                                       |
| 5~991259           | Chr5                | 991259                       | NA           | NA                          | 5.25E-06        | 0.0359                      | NA                       | NA                          | NA                       | NA                          | 5' UTR                    | NA                                                       |
| 11~25783593        | Chr11               | 2.60E+07                     | NA           | NA                          | 8.95E-06        | 0.0544                      | NA                       | NA                          | NA                       | NA                          | Intergenic                | NA                                                       |
| <b>Adm~7425964</b> | <b>Adm</b>          | <b>7425964</b>               | <b>NA</b>    | <b>NA</b>                   | <b>1.44E-05</b> | <b>0.0789</b>               | <b>NA</b>                | <b>NA</b>                   | <b>NA</b>                | <b>NA</b>                   | <b>NA</b>                 | <b>NA</b>                                                |
| 2~18141348         | Chr2                | 1.80E+07                     | NA           | NA                          | 2.03E-05        | 0.1011                      | NA                       | NA                          | NA                       | NA                          | Intergenic                | NA                                                       |
| 9~5770786          | Chr9                | 5770786                      | NA           | NA                          | 2.25E-05        | 0.1027                      | NA                       | NA                          | NA                       | NA                          | Intergenic                | NA                                                       |
| 11~27490883        | Chr11               | 2.70E+07                     | NA           | NA                          | 2.65E-05        | 0.1116                      | NA                       | NA                          | NA                       | NA                          | Downstream                | NA                                                       |
| 3~25711563         | Chr3                | 2.60E+07                     | NA           | NA                          | 5.30E-05        | 0.2073                      | NA                       | NA                          | NA                       | NA                          | Intergenic                | NA                                                       |
| 5~5390763          | Chr5                | 5390763                      | NA           | NA                          | NA              | NA                          | 7E-08                    | 0.348                       | 7.60E-08                 | 0.002                       | Downstream                | <i>GW5 (LOC_Os05g09520)</i>                              |
| 4~4486000          | Chr4                | 4486000                      | NA           | NA                          | NA              | NA                          | 7.98E-06                 | 0.145                       | 7.99E-06                 | 0.145                       | Missense                  | <i>LRR family protein encoding gene (LOC_Os04g08390)</i> |
| 10~21588761        | Chr10               | 2.20E+07                     | NA           | NA                          | NA              | NA                          | 4.14E-05                 | 0.454                       | 4.14E-05                 | 0.454                       | Intergenic                | NA                                                       |
| 11~2611306         | Chr11               | 2611306                      | NA           | NA                          | NA              | NA                          | 0.00004                  | 0.454                       | 4.15E-05                 | 0.454                       | Upstream                  | NA                                                       |
| 8~17187746         | Chr8                | 1.70E+07                     | NA           | NA                          | NA              | NA                          | 5.82E-05                 | 0.501                       | 5.82E-05                 | 0.501                       | Upstream                  | NA                                                       |
| 5~4222429          | Chr5                | 4222429                      | NA           | NA                          | NA              | NA                          | 6.41E-05                 | 0.501                       | 6.42E-05                 | 0.501                       | Intergenic                | NA                                                       |

Chr: Chromosome; Pseudo-chr: Pseudo-chromosome; 5' UTR/3' UTR: five prime untranslated region/ three prime untranslated region defined as per MSU7.0 annotation; Upstream: SNPs located >2 kb upstream from transcription start site of a gene; Downstream: SNPs located >2 kb downstream from transcription stop site of a gene; IG: Indica Group; JG: Japonica Group; Adm: Admixture \*Structural annotation performed using MSU 7.0; #Rice Annotation Project locus ID; The loci detected from pseudo-chromosomes are highlighted in red.
