# Supplementary material for: Rice Pan-genome Array (RPGA): an efficient genotyping solution for pan-genome-based accelerated crop improvement in rice
Source: bioRxiv or medRxiv preprint supplement (doi:10.1101/2022.01.19.476884), 2022-01-21
Supplement: Supplementary file [file media-21.pdf]

**Supplemental Table 8.** Details of GWAS for grain length, grain width and thousand-grain weight trait performed using FarmCPU

| SNP-ID       | Chr/Pseudo-<br>chr+ | Physical position<br>(bp) | Grain length |                       | Grain width |                       | Length-to-width ratio |                       | Thousand-grain weight |                       | Structural annotation* | Candidate genes                                                         |
|--------------|---------------------|---------------------------|--------------|-----------------------|-------------|-----------------------|-----------------------|-----------------------|-----------------------|-----------------------|------------------------|-------------------------------------------------------------------------|
|              |                     |                           | P-value      | FDR adjusted P-values | P-value     | FDR adjusted P-values | P-value               | FDR adjusted P-values | P-value               | FDR adjusted P-values |                        |                                                                         |
| JG10~6950498 | JG10                | 6950498                   | 1.07E-11     | 5.87E-07              | NA          | NA                    | NA                    | NA                    | NA                    | NA                    | NA                     | <i>WD repeat-containing protein 12 (LOC_Os07g40930)</i>                 |
| JG10~4245875 | JG10                | 4245875                   | 3.38E-08     | 0.000925              | NA          | NA                    | NA                    | NA                    | NA                    | NA                    | Upstream               | <i>Unknown function (OsR498G0612839600.01)</i>                          |
| 7~25105073   | Chr7                | 25105073                  | 2.15E-07     | 0.003919              | NA          | NA                    | NA                    | NA                    | NA                    | NA                    | Upstream               | <i>LFR (LOC_Os07g41900)</i>                                             |
| 3~16733441   | Chr3                | 16733441                  | 2.86E-07     | 0.003919              | NA          | NA                    | NA                    | NA                    | NA                    | NA                    | Intergenic             | <i>GS3(LOC_Os03g0407400)</i>                                            |
| 12~25514661  | Chr12               | 25514661                  | 8.68E-07     | 0.007971              | NA          | NA                    | NA                    | NA                    | NA                    | NA                    | Intergenic             | <i>IQ calmodulin-binding motif family protein (LOC_Os12g41160)</i>      |
| 1~34538998   | Chr1                | 34538998                  | 8.74E-07     | 0.007971              | NA          | NA                    | NA                    | NA                    | NA                    | NA                    | Intergenic             | <i>qGRL1.1/OsGAMYB (LOC_Os01g59660)</i>                                 |
| 11~6484221   | Chr11               | 6484221                   | 3.51E-06     | 0.027446              | NA          | NA                    | NA                    | NA                    | NA                    | NA                    | Upstream               | NA                                                                      |
| 10~20357189  | Chr10               | 20357189                  | 8.13E-06     | 0.055605              | NA          | NA                    | NA                    | NA                    | NA                    | NA                    | Intergenic             | NA                                                                      |
| JG10~6243872 | JG10                | 6243872                   | 2.46E-05     | 0.149332              | NA          | NA                    | 5.69E-08              | 0.002                 | 5.69E-08              | 0.002078              | NA                     | <i>OsCML28 (LOC_Os12g12730)</i><br><i>CAMK-like-46 (LOC_Os12g12860)</i> |
| 1~34538998   | Chr1                | 34538998                  | 8.74E-07     | 0.007971              | NA          | NA                    | NA                    | NA                    | NA                    | NA                    | Intergenic             | <i>qGRL1.1/OsGAMYB (LOC_Os01g59660)</i>                                 |
| 11~24534050  | Chr11               | 24534050                  | NA           | NA                    | 2.35E-10    | 1.29E-05              | NA                    | NA                    | NA                    | NA                    | 3' UTR                 | <i>Receptor-like protein kinase precursor (LOC_Os11g40970)</i>          |

| SNP-ID             | Chr/Pseudo-chr+ | Physical position (bp) | Grain length |                       | Grain width     |                       | Length-to-width ratio |                       | Thousand-grain weight |                       | Structural annotation* | Candidate genes                                          |
|--------------------|-----------------|------------------------|--------------|-----------------------|-----------------|-----------------------|-----------------------|-----------------------|-----------------------|-----------------------|------------------------|----------------------------------------------------------|
|                    |                 |                        | P-value      | FDR adjusted P-values | P-value         | FDR adjusted P-values | P-value               | FDR adjusted P-values | P-value               | FDR adjusted P-values |                        |                                                          |
| 5~5371686          | Chr5            | 5371686                | NA           | NA                    | 3.36E-08        | 0.0007                | NA                    | NA                    | NA                    | NA                    | Downstream             | <i>GW5 (LOC_Os05g09520)</i>                              |
| 11~23154487        | Chr11           | 23154487               | NA           | NA                    | 4.38E-06        | 0.0342                | NA                    | NA                    | NA                    | NA                    | Synonymous             | NA                                                       |
| 5~991259           | Chr5            | 991259                 | NA           | NA                    | 5.25E-06        | 0.0358                | NA                    | NA                    | NA                    | NA                    | 5' UTR                 | NA                                                       |
| 11~25783593        | Chr11           | 25783593               | NA           | NA                    | 8.95E-06        | 0.0544                | NA                    | NA                    | NA                    | NA                    | Intergenic             | NA                                                       |
| <b>Adm~7425964</b> | <b>Chr13</b>    | <b>7425964</b>         | <b>NA</b>    | <b>NA</b>             | <b>1.44E-05</b> | <b>0.07894</b>        | <b>NA</b>             | <b>NA</b>             | <b>NA</b>             | <b>NA</b>             | <b>NA</b>              | <b>NA</b>                                                |
| 5~5390763          | Chr5            | 5390763                | NA           | NA                    | NA              | NA                    | 0.000000076           | 0.002                 | 7.60E-08              | 0.002                 | Downstream             | <i>GW5 (LOC_Os05g09520)</i>                              |
| 4~4486000          | Chr4            | 4486000                | NA           | NA                    | NA              | NA                    | 7.99E-06              | 0.146                 | 7.99E-06              | 0.1456                | Missense               | <i>LRR family protein encoding gene (LOC_Os04g08390)</i> |
| 10~21588761        | Chr10           | 21588761               | NA           | NA                    | NA              | NA                    | 4.14E-05              | 0.45                  | 4.14E-05              | 0.45409               | Intergenic             | NA                                                       |
| 11~2611306         | Chr11           | 2611306                | NA           | NA                    | NA              | NA                    | 4.149E-05             | 0.93                  | 4.15E-05              | 0.45409               | Upstream               | NA                                                       |
| 8~17187746         | Chr8            | 17187746               | NA           | NA                    | NA              | NA                    | 5.82E-05              | 0.501                 | 5.82E-05              | 0.50151               | Upstream               | NA                                                       |
| 5~4222429          | Chr5            | 4222429                | NA           | NA                    | NA              | NA                    | 6.42E-05              | 0.502                 | 6.42E-05              | 0.50151               | Intergenic             | NA                                                       |
| 9~8180057          | Chr9            | 8180057                | NA           | NA                    | NA              | NA                    | 7.90E-05              | 0.540                 | 7.90E-05              | 0.5404                | Downstream             | NA                                                       |

Chr: Chromosome; Pseudo-chr: Pseudo-chromosome; 5' UTR/3' UTR: five prime untranslated region/ three prime untranslated region defined as per MSU7.0 annotation; Upstream: SNPs located >2 kb upstream from transcription start site of a gene; Downstream: SNPs located >2 kb downstream from transcription stop site of a gene; IG: Indica Group; JG: Japonica Group; Adm: Admixture \*Structural annotation performed using MSU 7.0; #Rice Annotation Project locus ID; The loci detected from pseudo-chromosomes are highlighted in red.
