# Supplementary material for: Rice Pan-genome Array (RPGA): an efficient genotyping solution for pan-genome-based accelerated crop improvement in rice
Source: bioRxiv or medRxiv preprint supplement (doi:10.1101/2022.01.19.476884), 2022-01-21
Supplement: Supplementary file [file media-22.pdf]

**Supplementary Table 9.** Details of GWAS for grain length, grain width and thousand-grain weight trait performed using BLINK

| SNP-ID         | Chr/Pseudo-<br>chr+ | Physical<br>position<br>(bp) | Grain length |                             | Grain width |                             | Length-to-width<br>ratio |                             | Thousand-grain<br>weight |                             | Structural<br>annotation* | Candidate genes                                                              |
|----------------|---------------------|------------------------------|--------------|-----------------------------|-------------|-----------------------------|--------------------------|-----------------------------|--------------------------|-----------------------------|---------------------------|------------------------------------------------------------------------------|
|                |                     |                              | P-value      | FDR<br>adjusted<br>P-values | P-value     | FDR<br>adjusted<br>P-values | P-<br>value              | FDR<br>adjusted<br>P-values | P-value                  | FDR<br>adjusted<br>P-values |                           |                                                                              |
| JG10~6950498   | JG10                | 6950498                      | 3.25E-10     | 1.78E-05                    | NA          | NA                          | NA                       | NA                          | NA                       | NA                          | NA                        | <i>WD repeat-containing protein 12 (LOC_Os07g40930)</i>                      |
| 3~3775429      | Chr 3               | 3775429                      | 5.46E-08     | 1.49E-03                    | NA          | NA                          | NA                       | NA                          | NA                       | NA                          | Upstream                  | <i>PGL1 (LOC_Os03g07510)</i>                                                 |
| 4~1881177      | Chr 4               | 1881177                      | 5.73E-06     | 0.104                       | NA          | NA                          | NA                       | NA                          | NA                       | NA                          | Intergenic                | NA                                                                           |
| JG10~4325684   | JG10                | 4325684                      | 4.47E-05     | 0.499                       | NA          | NA                          | NA                       | NA                          | NA                       | NA                          | NA                        | NA                                                                           |
| AUSG6~24889549 | AUSG6               | 24889549                     | 4.57E-05     | 0.499                       | NA          | NA                          | NA                       | NA                          | NA                       | NA                          | NA                        | NA                                                                           |
| JG10~2239066   | JG10                | 2239066                      | 5.86E-05     | 0.534                       | NA          | NA                          | NA                       | NA                          | NA                       | NA                          | NA                        | NA                                                                           |
| 6~2735663      | Chr 6               | 2735663                      | 7.72E-05     | 0.603                       | NA          | NA                          | NA                       | NA                          | NA                       | NA                          | Downstream                | NA                                                                           |
| JG10~4882245   | JG10                | 4882245                      | 8.86E-05     | 0.606                       | NA          | NA                          | NA                       | NA                          | NA                       | NA                          | NA                        | NA                                                                           |
| 2~35350740     | Chr2                | 35350740                     | NA           | NA                          | 2.11E-05    | 0.661                       | NA                       | NA                          | NA                       | NA                          | Intergenic                | NA                                                                           |
| IG2~35461875   | Chr17               | 35461875                     | NA           | NA                          | 2.44E-05    | 0.661                       | NA                       | NA                          | NA                       | NA                          | NA                        | NA                                                                           |
| 2~24960784     | Chr2                | 24960784                     | NA           | NA                          | 6.21E-05    | 0.661                       | NA                       | NA                          | NA                       | NA                          | Upstream                  | NA                                                                           |
| 2~35350740     | Chr2                | 35350740                     | NA           | NA                          | 2.11E-05    | 0.661                       | NA                       | NA                          | NA                       | NA                          | Intergenic                | NA                                                                           |
| IG5~14354843   | IG5                 | 14354843                     | NA           | NA                          | NA          | NA                          | NA                       | NA                          | 1.69E-10                 | 9.26E-06                    | NA                        | <i>GW5 (LOC_Os05g09520)</i>                                                  |
| 12~7132122     | Chr12               | 7132122                      | NA           | NA                          | NA          | NA                          | NA                       | NA                          | 7.51E-09                 | 0.0002                      | Intergenic                | <i>OsCML28 (LOC_Os12g12730); CAMK-like-46 encoding gene (LOC_Os12g12860)</i> |
| 10~6148264     | Chr10               | 6148264                      | NA           | NA                          | NA          | NA                          | NA                       | NA                          | 9.08E-08                 | 0.00145                     | Synonymous                | <i>Ubiquitin conjugating enzyme encoding gene (LOC_Os10g11260)</i>           |

| SNP-ID                    | Chr/Pseudo-<br>chr + | Physical<br>position<br>(bp) | Grain length |                             | Grain width |                             | Length-to-width<br>ratio |                             | Thousand-grain<br>weight |                             | Structural<br>annotation* | Candidate genes         |
|---------------------------|----------------------|------------------------------|--------------|-----------------------------|-------------|-----------------------------|--------------------------|-----------------------------|--------------------------|-----------------------------|---------------------------|-------------------------|
|                           |                      |                              | P-value      | FDR<br>adjusted<br>P-values | P-value     | FDR<br>adjusted<br>P-values | P-value                  | FDR<br>adjusted<br>P-values | P-value                  | FDR<br>adjusted<br>P-values |                           |                         |
| IG5~13672041              | IG5                  | 13672041                     | NA           | NA                          | NA          | NA                          | NA                       | NA                          | 1.06E-07                 | 0.0014                      | NA                        | NA                      |
| 9~12332184                | Chr 9                | 12332184                     | NA           | NA                          | NA          | NA                          | NA                       | NA                          | 7.39E-07                 | 0.008                       | Intergenic                | NA                      |
| 5~5390763                 | Chr5                 | 5390763                      | NA           | NA                          | NA          | NA                          | NA                       | NA                          | 9.78E-07                 | 0.0089                      | Downstream                | GW5<br>(LOC_Os05g09520) |
| IG5~16943583              | IG5                  | 16943583                     | NA           | NA                          | NA          | NA                          | NA                       | NA                          | 2.23E-05                 | 0.1524                      | NA                        | NA                      |
| 6~24535560                | Chr6                 | 24535560                     | NA           | NA                          | NA          | NA                          | NA                       | NA                          | 3.36E-05                 | 0.2042                      | Intergenic                | NA                      |
| 3~7225647                 | Chr3                 | 7225647                      | NA           | NA                          | NA          | NA                          | NA                       | NA                          | 4.14E-05                 | 0.2268                      | Intergenic                | NA                      |
| 6~23900256                | Chr6                 | 23900256                     | NA           | NA                          | NA          | NA                          | NA                       | NA                          | 5.42E-05                 | 0.2497                      | Upstream                  | NA                      |
| 10~19634914               | Chr10                | 19634914                     | NA           | NA                          | NA          | NA                          | NA                       | NA                          | 5.48E-05                 | 0.249795<br>563             | Intergenic                | NA                      |
| IG3~5847364               | IG3                  | 5847364                      | NA           | NA                          | NA          | NA                          | NA                       | NA                          | 6.52E-05                 | 0.274304<br>155             | NA                        | NA                      |
| IG5~12291400              | IG5                  | 12291400                     | NA           | NA                          | NA          | NA                          | NA                       | NA                          | 8.49E-05                 | 0.323929<br>122             | NA                        | NA                      |
| 2~25991206                | 2                    | 25991206                     | NA           | NA                          | NA          | NA                          | 2E-07                    | 0.01095                     | NA                       | NA                          | Intergenic                | NA                      |
| 7~23605893                | 7                    | 23605893                     | NA           | NA                          | NA          | NA                          | 1.9E-06                  | 0.05168                     | NA                       | NA                          | Upstream                  | NA                      |
| unaln_IG1~478378<br>73    | 16                   | 47837873                     | NA           | NA                          | NA          | NA                          | 3.8E-06                  | 0.06959                     | NA                       | NA                          | NA                        | NA                      |
| unaln_AROG11~1<br>1935468 | 14                   | 11935468                     | NA           | NA                          | NA          | NA                          | 7.9E-06                  | 0.10769                     | NA                       | NA                          | NA                        | NA                      |
| unaln_IG5~143548<br>43    | 20                   | 14354843                     | NA           | NA                          | NA          | NA                          | 3E-05                    | 0.32688                     | NA                       | NA                          | NA                        | NA                      |

Chr: Chromosome; Pseudo-chr: Pseudo-chromosome; 5' UTR/3' UTR: five prime untranslated region/ three prime untranslated region defined as per MSU7.0 annotation; Upstream: SNPs located >2 kb upstream from transcription start site of a gene; Downstream: SNPs located >2 kb downstream from transcription stop site of a gene; IG: Indica Group; JG: Japonica Group; Adm: Admixture \*Structural annotation performed using MSU 7.0; #Rice Annotation Project locus ID; The loci detected from pseudo-chromosomes are highlighted in red.
