# Supplementary material for: Rice Pan-genome Array (RPGA): an efficient genotyping solution for pan-genome-based accelerated crop improvement in rice
Source: bioRxiv or medRxiv preprint supplement (doi:10.1101/2022.01.19.476884), 2022-01-21
Supplement: Supplementary file [file media-23.pdf]

**Supplementary Table 10.** Details of QTLs identified for grain weight and grain size traits utilizing Sonasal × Pusa Basmati 1121 RILs

| Trait                       | QTL          | Chr | Start-End position (cM) | Genetic Interval (cM) | Start-End position (bp) | Physical Interval (bp) | LOD  | PVE  | Add   | Number of genes | Candidate genes                  |
|-----------------------------|--------------|-----|-------------------------|-----------------------|-------------------------|------------------------|------|------|-------|-----------------|----------------------------------|
| Thousand Grain Weight       | <i>qTGW3</i> | 3   | 68.24-70.14             | 1.9                   | 16056008-16760451       | 704443                 | 13.2 | 35.7 | 2.79  | 94              | <i>Grain Size 3</i>              |
| Grain Length                | <i>qGL3</i>  | 3   | 68.24-70.14             | 1.9                   | 16056008-16760451       | 704443                 | 18.9 | 42.0 | 1.04  | 94              | <i>Grain Size 3</i>              |
| Grain Length                | <i>qGL7</i>  | 7   | 61.68-67.38             | 5.7                   | 24381212-25779322       | 1398110                | 3.3  | 9.7  | 0.49  | 218             | Slender LG7                      |
| Grain Width                 | <i>qGW7</i>  | 7   | 49.61-61.68             | 6.8                   | 19854664-24381212       | 4526548                | 4.9  | 13.3 | -0.08 | 708             | <i>OsBZR1</i> ;<br><i>OsGRS9</i> |
| Grain Length to Width Ratio | <i>qLWR3</i> | 3   | 67.87-67.11             | 0.76                  | 17120362-17948581       | 828219                 | 15.5 | 33.4 | 0.47  | 129             | NA                               |
| Grain Length to Width Ratio | <i>qLWR7</i> | 7   | 62.04-62.39             | 0.35                  | 24405861-24591612       | 185751                 | 5.4  | 9.8  | 0.26  | 31              | NA                               |
